# 1 Degradation of benzene by the heavy-metal resistant 2 bacterium *Cupriavidus metallidurans* CH34 reveals its 3 catabolic potential for aromatic compounds

4  
5 Felipe A. Millacura<sup>1,2,3</sup>, Franco Cárdenas<sup>1</sup>, Valentina Mendez<sup>1</sup>, Michael Seeger<sup>1\*</sup> Luis A. Rojas<sup>2,4\*</sup>

## 6 7 Author Address

8 <sup>1</sup>Chemistry Department, Federico Santa Maria Technical University, Valparaiso, Chile

9 <sup>2</sup>Scientific and Technological Research Center for Mining, CICITEM, Antofagasta, Chile

10 <sup>3</sup>Present address: School of Biological Sciences, University of Edinburgh, Edinburgh, EH9 3JQ, UK

11 <sup>4</sup>Present address: Chemistry Department, Faculty of Sciences, Universidad Catolica del Norte, Antofagasta,  
12 Chile

13  
14 **Keywords:** aromatic compounds, benzene, biodegradation, *Cupriavidus metallidurans*, lead, mercury,  
15 oxygenases, heavy metals.

## 16 17 Corresponding authors

### 18 19 Luis A. Rojas (LAR)

20 E-mail: [luis.rojas02@ucn.cl](mailto:luis.rojas02@ucn.cl)

21 <sup>4</sup>Present address: Chemistry Department, Faculty of Sciences, Universidad Catolica del Norte, Antofagasta,  
22 Chile

### 23 24 Michael Seeger (MS)

25 E-mail: [michael.seeger@usm.cl](mailto:michael.seeger@usm.cl)

26 <sup>1</sup>Laboratory of Molecular Microbiology and Environmental Biotechnology, Chemistry Department, Federico Santa  
27 Maria Technical University, Valparaiso, Chile

## 28 29 HIGHLIGHTS

- 30 • The strain *Cupriavidus metallidurans* CH34 is capable to degrade benzene aerobically
- 31 • Benzene oxydation is mediated by bacterial multicomponent monooxygenases
- 32 • Strain CH34 is able to grow using a broad range of aromatic compounds as sole carbon and energy  
33 source
- 34 • Benzene degradation occurs even in presence of heavy metals such as mercury and lead

35

## 36 Abstract

37

38 Benzene, toluene, ethylbenzene and the three xylene isomers are monoaromatic contaminants widely  
39 distributed on polluted sites. Some microorganisms have developed mechanisms to degrade these  
40 compounds, but their aerobic and anaerobic degradation is inhibited in presence of heavy metals, such as  
41 mercury or lead. In this report, the degradation of benzene and other aromatic compounds catalyzed by the  
42 metal resistant bacterium *Cupriavidus metallidurans* CH34 was characterized. A metabolic reconstruction of  
43 aromatic catabolic pathways was performed based on bioinformatics analyses. Functionality of the predicted  
44 pathways was confirmed by growing strain CH34 on benzene, toluene, *o*-xylene, *p*-cymene, 3-  
45 hydroxybenzoate, 4-hydroxybenzoate, 3-hydroxyphenylacetate, 4-hydroxyphenylacetate, homogentisate,  
46 catechol, naphthalene, and 2-aminophenol as sole carbon and energy sources. Benzene catabolic pathway  
47 was further characterized. Results showed that firstly benzene is transformed into phenol and, thereafter, into  
48 catechol. Benzene is degraded under aerobic conditions via a combined pathway catalyzed by three Bacterial  
49 Multicomponent Monooxygenases: a toluene-2-monooxygenase (TomA012345), a toluene-4-monooxygenase  
50 (TmoABCDEF) and a phenol-2-hydroxylase (PhyZABCDE). A catechol-2,3-dioxygenase (TomB) expressed at  
51 early exponential phase cleaves the catechol ring in *meta*-position; an *ortho*-cleavage of catechol is  
52 accomplished by a catechol-1,2-dioxygenase (CatA) at late exponential phase instead. This study additionally  
53 shows that *C. metallidurans* CH34 is capable of degrading benzene in presence of heavy metals, such as  
54 Hg(II) or Pb(II). This capability of degrading aromatic compounds in presence of heavy metals is rather  
55 unusual among environmental bacteria; therefore, *C. metallidurans* CH34 seems to be a promising candidate  
56 for developing novel bioremediation process for multi-contaminated environments.

57

58

59

60

61

62

63

64

65

66

67

68

69

70

71

72

73

## 74 Introduction

75

76 Monoaromatic molecules such as benzene, toluene, ethylbenzene and the three-xylene isomers (*ortho*, *meta*  
77 and *para*) are commonly known as BTEX (Parales et al., 2008; Choi et al., 2013). They are part of the volatile  
78 fraction of petroleum hydrocarbons and are often found in industrial polluted sites as remnant of chemical  
79 products, fuels, solvents or lubricants (Fuchs et al., 2011; Fuentes et al., 2014). Their toxicity is well known  
80 due to their mutagenic and carcinogenic effects exerted via bioaccumulation in animal and human tissues  
81 (Browning, 1961; Dean, 1978; Fuentes et al., 2014). The most hazardous and toxic BTEX is benzene which  
82 causes cancer and leukemia in humans (Dean, 1978; World Health Organization, 1993; van der Park, 2014),  
83 currently considered as the fourth priority substance in the environmental quality standards upheld within the  
84 European Union (EU Parliament, 2008). Benzene not only contaminates soils but also ground water and  
85 atmosphere (Browning, 1961; Lovley, 1995). The low level of benzene permitted on potable water in the  
86 United States demonstrates that it is considered a high risk for human health. Indeed, US maximum levels for  
87 BTEX in potable water are 0.05, 1.00, 0.70 and 10 ppm for benzene, toluene, ethylbenzene and the xylene  
88 isomers, respectively (USEPA, 2006).

89

90 Although these aromatic compounds are toxic, some bacteria have developed mechanisms to survive in  
91 contaminated environments using these compounds as substrate for their growth (Fuchs et al., 2011; Fuentes  
92 et al., 2014). For instance, Benzene is oxidized into phenol by the bacterial multicomponent monooxygenases  
93 (BMM) present in *C. pinatubonensis* JMP134 or into *cis*-benzenediol catalyzed by the benzene dioxygenase  
94 from *P. putida* F1 (Reardon et al., 2000). Both pathways converge in the central intermediate catechol that is  
95 thereafter cleaved and degraded through the tricarboxylic acid cycle (Zamanian and Mason, 1987; Bertoni et  
96 al., 1998). Therefore, the use of microorganisms arises as a promising strategy for the clean-up of aromatic  
97 compounds, such as petroleum hydrocarbons, pesticides and chlorophenols. Successful examples of *in situ*  
98 soil bioremediation performed by bacteria have been described (Chen et al., 2015). However, either aerobic  
99 and anaerobic degradation of BTEX is inhibited in sites co-contaminated with heavy metals, such as mercury  
100 and lead (Kovalick, 1991; Muniz et al., 2004; Davydova, 2005; Kavamura and Esposito, 2010; Dórea et al.,  
101 2007).

102

103 Heavy metals and BTEX compounds are widespread together in the environment due to diverse  
104 anthropogenic factors, e.g., urban and mining activities. Mercury has been extensively used in gold amalgam  
105 extraction, whereas lead has been used for many decades in its tetraethyl form as a fuel additive (Veiga and  
106 Meech, 1991; Nascimento and Chartone-Souze, 2003; Sandrin and Maier, 2003; Seyferth, 2003; Kovarik,  
107 2005; Kristensen et al., 2014). As BTEX contamination is predominantly originated by oil- and petroleum spills,  
108 a third of sites contaminated with organic compounds are also contaminated with inorganic compounds  
109 (Kovalick, 1991). In fact, approximately 40% of the hazardous waste sites in the US are contaminated  
110 simultaneously with organic and inorganic contaminants (Sandrin and Maier, 2003). Additionally, European  
111 Union (2008) stipulated benzene, lead, and mercury, as respectively the fourth, twentieth, and twenty-first

112 priority substances in terms of European environmental quality standards (EU Parliament, 2008). As  
113 environmental problems remain a major challenge, development of novel bioremediation approaches to  
114 assess bioremediation of co-contaminated sites is urgently required.

115  
116 Bacterial resistance to heavy metals is well-documented (Silver, 1996; Mergeay et al., 2003; Smalla et al.,  
117 2006; Rojas et al., 2011; Altimira et al., 2012). Particularly, the strain *Cupriavidus metallidurans* CH34 is a  
118 heavy metal-resistant model bacterium that harbors two large plasmids, pMOL28 and pMOL30, which carry  
119 genetic determinants for heavy metal resistance (Mergeay et al., 1985; Mergeay et al., 2003; Monchy et al.,  
120 2007; Janssen et al., 2010). Furthermore, diverse catabolic clusters have been detected on the genome of  
121 *C. metallidurans* strains and *Cupriavidus* sp. (Mergeay et al., 1985; Janssen et al., 2010; Pérez-Pantoja et al.,  
122 2012; Rosier et al., 2012; Mergeay and van Houdt, 2014; Basu et al., 2016), although its actual degrading  
123 potential has not yet been assessed. This research characterizes the degradation pathways of benzene and  
124 other aromatic compounds presents on the metal resistant bacterium *C. metallidurans* CH34. In addition, the  
125 growing of *C. metallidurans* CH34 on benzene in presence of mercury and lead was examined, in order to  
126 forecast future applications on bioremediation of co-contaminated sites.

127

## 128 **Materials and Methods**

129

### 130 **Chemicals**

131

132 Benzene, toluene, phenol and *o*-xylene (>99.7% purity) were obtained from Merck (Darmstadt, Germany), 3-  
133 hydroxybenzoate, 4-hydroxybenzoate, 3-hydroxyphenylacetate, 4-hydroxyphenylacetate, 2,5-  
134 dihydroxyphenylacetate (homogentisate), catechol, 2-aminophenol, naphthalene and *p*-cymene (>98% purity)  
135 were obtained from Sigma Aldrich (St. Louis, MO, USA). HgCl<sub>2</sub> and Pb(NO<sub>3</sub>)<sub>2</sub> were obtained from Merck  
136 (Darmstadt, Germany) and used to prepare Hg(II) and Pb(II) stock solutions. Sodium succinate dibasic  
137 hexahydrate was obtained from Sigma (Steinheim, Germany; >99.0% purity).

138

### 139 **Bacterial strains and culture conditions**

140

141 *C. metallidurans* CH34, *Pseudomonas putida* mt-2 and *Pseudomonas putida* G7 were cultivated in low-  
142 phosphate Tris-buffered mineral salts (LPTMS) medium at 30°C. The LPTMS medium contained (per 1 L):  
143 6.06 g Tris Base USP (US Biological, Swampscott MA, USA); 4.68 g NaCl (Merck, Darmstadt, Germany); 1.07  
144 g NH<sub>4</sub>Cl (Merck, Darmstadt, Germany); 1.49 g KCl (Merck, Darmstadt, Germany); 0.43 g Na<sub>2</sub>SO<sub>4</sub> (Merck,  
145 Darmstadt, Germany); 0.2 g MgCl<sub>2</sub>•6H<sub>2</sub>O (J.T. Baker, Phillipsburg, NJ, USA); 0.03 g CaCl<sub>2</sub>•H<sub>2</sub>O (Merck,  
146 Darmstadt, Germany); 0.005 g Fe(III)(NH<sub>4</sub>) citrate (Merck, Darmstadt, Germany), and 1 mL of trace element  
147 solution SL7 of Biebl and Pfennig (Mergeay et al., 1985; Rojas et al., 2011). Additionally, *Burkholderia*  
148 *xenovorans* LB400 was cultivated at 30°C in mineral M9 medium with an elemental trace solution (Méndez et

149 al., 2011). Succinate (10 mM), benzene (5 mM), or other aromatic compounds (1 mM) were used as sole  
150 carbon and energy source, provided directly in liquid phase if not otherwise stipulated. Growth assays were  
151 performed in triplicate measuring turbidity at 600 nm. To determine the Hg(II) and Pb(II) Minimal Inhibitory  
152 Concentrations (MICs) during growth of CH34 on benzene, the bacteria were grown on liquid LPTMS minimal  
153 medium using benzene (5 mM) as only carbon and energy source. Bacteria were challenged to increasing  
154 concentrations of Hg(II) and Pb(II) from stock solutions of HgCl<sub>2</sub> and PbCl<sub>2</sub> analytical grade (Sigma Aldrich  
155 Saint Louis, MO, USA).

156

## 157 **Bioinformatic analysis**

158

159 Genome of *C. metallidurans* CH34 has been sequenced and mostly annotated (Janssen et al., 2010).  
160 Sequences for chromosome (NC\_007973.1), chromid (NC\_007974.2), pMOL28 (NC\_007972.2) and pMOL30  
161 (NC\_007971.2) were obtained from the GenBank database. The metabolic reconstruction was based on  
162 standard protocols (Thiele and Palsson, 2010; Nogales, 2014). An initial draft was generated using SEED 2.0  
163 (Overbeek et al., 2005). Predictions were refined and curated manually by applying NCBI/BLAST searches  
164 (<http://blast.ncbi.nlm.nih.gov/Blast.cgi>), the metabolic database MetaCyc (<http://metacyc.org/>), and the  
165 database of genes and genomes of Kyoto, KEGG (<http://www.genome.jp/kegg/>). Prediction of promoter  
166 regions was performed using BacPP software (de Avila e Silva, 2011) augmented by protein association  
167 analysis using STRING v9.1 software (Franceschini et al., 2013). Orthologous gene sequence analysis was  
168 performed at aminoacid level using Clustal-W software (<http://www.ebi.ac.uk/Tools/msa/clustalw2/>) under  
169 default parameters. In addition, the organization of gene clusters involved in BTEX degradation for CH34 with  
170 other BTEX degradative bacteria was compared by SEED viewer 2.0 tool. Metabolic pathway images were  
171 generated using the Ultra ChemBioDraw 13.0 software from Perkin Elmer.

172

## 173 **RNA Isolation**

174

175 Total RNA was isolated from *C. metallidurans* CH34 using the RNeasy mini kit (Qiagen, Hilden, Germany)  
176 according to the manufacturer's recommendations. TURBO DNFree set (LifeTechnologies, Carlsbad, USA)  
177 was used to degrade any residual DNA. A final qPCR test with *gyrB* primers designed by Primer 3.0 (Table  
178 S1) was performed in order to confirm a total degradation of DNA. The RNA concentration was quantified  
179 using a Qubit fluorometer (Invitrogen) and a Nanodrop spectrophotometer (Thermo Scientific). RNA integrity  
180 was tested by agarose (1%) gel electrophoresis.

181

## 182 **Real-Time RT-PCR**

183

184 Reverse transcription was carried out using 200 ng of RNA and was achieved with a High Capacity cDNA  
185 Reverse Transcription Kit (Applied Biosystems, California, USA). The Minimum Information for publication of  
186 Quantitative real-time PCR Experiments (MIQE) guideline was used as standard protocol (Taylor et al., 2010).

187 Real-time PCR was performed using 20 ng of cDNA on a StepOne Real-Time PCR System (Applied  
188 Biosystems, California, USA), using Maxima SYBR Green/ROX qPCR Master Mix (Thermo Scientific,  
189 California USA) and 0.3  $\mu$ M of each primer. cDNA was initially denatured at 95°C for 5 min. A 40-cycle  
190 amplification and quantification protocol (95°C for 15 s, 55°C for 15 s and 60°C for 15 s) with a single  
191 fluorescence measurement per cycle followed by a melting-curve program (95°C for 15 s, 25°C for 1 s, 50°C  
192 for 15 s and 95°C for 1 s) were used according to the manufacturer's recommendations. PCR melting curves  
193 confirmed the amplification of a single product for each primer pair. Primers yielded products between 200-250  
194 bp. The *gyrB* (Rmet\_0003) gene was amplified as a reference gene, yielding an amplicon of 233 bp. A  
195 standard curve in triplicate was made with serial dilutions (10 fold) for each amplicon in a linear range (10 ng –  
196 0.1 pg) of genomic DNA. qPCR efficiencies were calculated from the slopes of the log-linear portion of  
197 calibration curves, using the equation  $E=10^{(1/\text{slope})}$ . Reference *gyrB* gene was stably expressed according to  
198 the algorithms of BestKeeper (Pfaffl et al., 2004). Relative gene expression ratios were determined as outlined  
199 by Pfaffl in 2001 (Pfaffl, 2001), thereby normalizing gene expression levels of CH34 cells grown on benzene  
200 versus CH34 cells grown on succinate.

201

## 202 **Intermediates detection**

203

204 Aliquots were taken at different times during the growth of *C. metallidurans* CH34 on benzene (5mM). Cells  
205 were lysed by sonication, centrifuged (19,000  $\times$  g for 5 min) and cell-free supernatants analyzed using a Jasco  
206 high performance liquid chromatograph (HPLC) model LC-2000 equipped with a diode array detector (DAD)  
207 Jasco model MD-2015 plus a RP 18e/Chromolith column of 100-4.6 mm (Merck, Darmstadt, Germany). The  
208 solvents used for sample elution were 0.1% formic acid in water (A) and 100% acetonitrile (B). The flow rate  
209 was 1.0 mL/min and the elution profile was 70% A:30% B for 4 min, then changed linearly to 0% A:100% B  
210 over a 1 min period and kept at this ratio for 3 min and finally changed linearly to 30% A:70% B over a 1 min  
211 period and kept at this ratio for 2 min. Benzene and phenol were quantified using calibration curves with  
212 authentic standards. Experiments were performed in triplicate. The formation of 2-hydroxymuconic  
213 semialdehyde (HMS) was determined during growth using a Perkin Elmer Lambda UV/VIS spectrophotometer  
214 by measuring the absorbance at 375 nm. HMS concentrations were calculated using the molar extinction  
215 coefficient of catechol as previously described (Nozaki et al., 1970).

216

## 217 **Results**

218

### 219 **Genomic analysis of CH34 genes involved in benzene degradation**

220

221 Genes encoding benzene peripheral and central catabolic pathways are located in two different chromosomal  
222 clusters. A first locus with a size of 24,547 bp is comprised from Rmet\_1305 to Rmet\_1331 (Table S2), and a  
223 second locus with an extension of 7,587 bp, including from Rmet\_1781 to Rmet\_1788 (Table S3). Both



224 clusters encode in total three Bacterial Multicomponent Monooxygenases (BMMs), two catechol dioxygenases  
225 (C23O and C12O), two transcriptional regulators (XylR/NtrC-type), a membrane transport protein (TbuX/FadL-  
226 type) and ten enzymes part of the central metabolism of diverse aromatics (Figure 1).

227

228 Interestingly, the gene clusters encoding monooxygenases from strain CH34 share a high synteny with  
229 aromatic degradative clusters from different *Proteobacteria* (Figure 1, Table S2). For instance, the  
230 organization of genes (*tmoABCDEF*) encoding the toluene-4-monooxygenase (T4MO) in *C. metallidurans*  
231 CH34, as well as the aa sequences of their products, are highly similar to the layout of the corresponding gene  
232 clusters and encoded product sequences from *C. pinatubonensis* JMP134 (TBC), *Pseudoxanthomonas spadix*  
233 BD-a59 (TMO), *Pseudomonas mendocina* KR1 (TMO) and *P. stutzeri* OX1 (TBU). The cluster (*phyZABCDE*)  
234 encoding the phenol-2-hydroxylase (PHY) from strain CH34 shows a high similarity in gene organization and  
235 amino acid (aa) sequence with the gene clusters from *C. pinatubonensis* JMP134 (PHL) and *Pseudomonas*  
236 sp. CF600 (DMP). The toluene-2-monooxygenase (T2MO) from strain CH34, encoded on *tomA012345*,  
237 presents a high similarity with the corresponding loci from *B. vietnamiensis* G4 (T2MO) and  
238 *Pseudoxanthomonas spadix* BD-a59 (T2MO). Finally, the predicted *tomBCEFGHI* gene cluster that encode  
239 enzymes of the central catabolic pathway in *C. metallidurans* CH34 is highly similar in organization and  
240 sequence to the *tomB*, *dmpCEFGHI*, *tomD* and *tomR* genes from *B. vietnamiensis* G4 and *dmpBCDEFGHI*  
241 from *Pseudomonas* sp. CF600 (pVI150) (Figure 1, Table S2).

242

243 Both are likely to be regulated by the XylR/NtrC-type transcriptional regulators TomR (Rmet\_1305) and  
244 PoxR (Rmet\_1788), highly related with their orthologs present on *B. vietnamiensis* G4 (97% aa) and *C.*  
245 *pinatubonensis* JMP134 (90% aa), respectively (Table S3). Additionally, the *tomX* (Rmet\_1326) gene encodes  
246 a TbuX/FadL-type membrane transport protein that possesses high similarity with the transporter TbuX from  
247 *B. multivorans* DDS15A-1, which is part of the Toluene\_X superfamily of monoaromatic outer membrane  
248 transport proteins (Hearn et al., 2009). We further identified the presence of transport proteins for other aromatic  
249 compounds. An ABC transporter permease for benzoate that is similar to BenK (Nishikawa et al., 2008),  
250 encoded formerly on genes located from Rmet\_1226 to Rmet\_1230, and a protocatechuate and 4-  
251 hydroxybenzoate transporter that is part of the superfamily of major facility transporters PcaK, encoded  
252 formerly on gene Rmet\_4011 (Harwood et al., 1994; Janssen et al., 2010).

253

254

## 255 **Growth of *C. metallidurans* CH34 on aromatic compounds**

256

257 This study reveals that *C. metallidurans* CH34 is capable of growing in liquid LPTMS minimal medium using  
258 benzene, toluene, *o*-xylene, *p*-cymene, 3-hydroxybenzoate, 4-hydroxybenzoate, 3-hydroxyphenylacetate, 4-  
259 hydroxyphenylacetate, homogentisate, catechol, naphthalene or 2-aminophenol as sole carbon and energy  
260 source (Table 1). Reaching and tolerating concentrations similar to model bacteria such as *P. putida* mt-2  
261 (toluene degrader), *P. putida* G7 (naphthalene degrader) and *B. xenovorans* LB400 (biphenyl degrader), used

262 in this study as reference strains for toluene, naphthalene, and biphenyl degradation, respectively. Although  
263 strain CH34 is capable of growing on diverse aromatics, it was not able to use other aromatic compounds as  
264 metabolic energy source, such as bisphenol A, phenanthrene, anthracene, vanillate, nitrobenzene, *m*-toluic  
265 acid, 4-isopropylbenzoic acid and 1,2,4-benzenetriol.

266 Interestingly, strain CH34 is able to tolerate benzene concentrations up to the saturation point in water (20  
267 mM) and is able to grow on presence of xylene isomers (*o*- *m*- *p*-) mixes (data not shown). Even though the  
268 growth on *p*-cymene, xylene (*o*- *m*- *p*-) isomers, 3-hydroxybenzoate, naphthalene, and 2-aminophenol was  
269 observed, orthologous genes for *xyl*, *cym/cum*, *nah*, *amn* were not found among the genome of CH34.

270

## 271 **Metabolic intermediates during benzene degradation**

272

273 In order to analyze the functionality and metabolic intermediates formation of the benzene pathway, growth  
274 assays on benzene were performed (Figure 2A). A yellow colorization was observed after 20 h of growth on  
275 benzene, which disappeared after 48 h. The color change of the growing culture suggests an active *meta*-  
276 cleavage pathway, likely due to the formation of 2-hydroxymuconic semialdehyde (Nozaki et al., 1970). In  
277 order to identify the metabolic intermediates generated during the growth, culture supernatants of CH34 cells  
278 grown on benzene (5 mM) were analyzed by HPLC (see Material and Methods). The results showed that  
279 benzene concentration decreased over time, while the appearance of phenol was observed after 15-26 h of  
280 growth (Figure 2B). Phenol is known to be an intermediate on benzene oxidation catalyzed by T2MO, T3MO  
281 and T4MO (Nozaki et al., 1970). Phenol is then transformed into catechol and further converted into  
282 intermediates from the catabolic central pathways through *meta* or *ortho* ring cleavage. Catechol was not  
283 detected by HPLC, maybe due to its fast degradation. Formation of 2-hydroxymuconic semialdehyde (HMS)  
284 was observed after 22h (early exponential phase), which suggests catechol degradation through *meta*-  
285 cleavage (Figure 2B). The formation of this intermediate occurs at an early exponential phase. Suggesting that  
286 *meta*-cleavage of the catechol ring is catalyzed by a catechol-2,3-dioxygenase (TomB) during early states of  
287 growth.

288

## 289 **Transcriptional analysis during benzene degradation**

290

291 Formation of 2-hydroxymuconic semialdehyde (HMS) was observed in cells grown on benzene during the  
292 exponential phase (Figure 2B); therefore, CH34 cells were grown on benzene (5 mM) and collected at early  
293 (turbidity of 0.2~0.3) and late (turbidity of 0.5~0.6) exponential phase. The expression of genes encoding the  
294 monooxygenases TOM (*tomA3*), TMO (*tmoA*), PHY (*phyC*), the dioxygenases C12O (*catA1* and *catA2*) and  
295 C23O (*tomB*), and the enzymes HMSD (*tomC*) and HMSH (*tomD*), were quantified. In addition, the  
296 transcription of the sigma-38 factor gene (*rpoS*) and the LysR-type (*catM* and *benM*) as well as the XylR/NtrC-  
297 type (*tomR* and *poxR*) transcriptional regulators were studied. Real time RT-PCR analysis showed a  
298 simultaneous expression of genes encoding monooxygenases in both early and late exponential phases  
299 (Figure 3). The *tomB* (C23O), *catA1* (C12O) and *catA2* (C12O) genes display a differential expression. *tomB*



300 gene was induced in the early and late exponential phases, whereas, *catA1* and *catA2* genes showed a low  
301 expression in the early stage of growth, and a further induction in the late exponential phase. In addition, the  
302 *tomC* and *tomD* genes were also expressed in early and late exponential phases showing that both pathways  
303 of HMS are active. The *tomR* gene encoding a XylR/NtrC-type transcriptional regulator was expressed in early  
304 and late exponential phases. In contrast, the sigma-38 factor gene (*rpoS*) and the *benM*, *catM*, and *poxR*  
305 genes encoding transcriptional regulators are expressed only in the late exponential phase (Figure 3).  
306

## 307 **Growth of *C. metallidurans* CH34 on benzene in presence of heavy** 308 **metals**

309 Strain CH34 was capable of growing on benzene in presence of mercury concentrations up to 0.005 mM (~1  
310 ppm). Likewise, the MIC to Pb(II) for strain CH34 was only slightly affected when benzene was used as a sole  
311 carbon source and its growth was unaffected at Pb(II) concentration of up to 0.2 mM (~82 ppm). The MIC was  
312 recorded as the lowest concentration (mM) of Hg(II) and Pb(II) at which no growth was observed (Table 2).  
313  
314

## 315 **Discussion**

316 In this study, we report metabolic insights of benzene degradation by *C. metallidurans* CH34 in order to  
317 understand the capabilities of strain CH34 to degrade aromatic compounds, even in the presence of heavy  
318 metals. Metabolic reconstruction of aerobic benzene degradation was performed based on genomic analysis,  
319 gene expression, intermediates detection, transcriptional analysis and growth studies.  
320

321 Two aerobic benzene catabolic pathways have been described (Bertoni et al., 1998; Reardon et al., 2000; Tao  
322 et al., 2004). Benzene can be oxidized by a BMM into phenol or by a benzene dioxygenase into *cis*-  
323 benzenediol (Zamanian and Mason, 1987; Bertoni et al., 1998). *C. metallidurans* CH34 possesses  
324 chromosomal gene clusters encoding three BMMs (Notomista et al., 2003; Janssen et al., 2010). The function  
325 of these BMMs associated to the degradation of benzene and other aromatic compounds was shown in this  
326 study (Figure 3). The findings obtained from the genomic studies reveal that BMM toluene-2-monooxygenase  
327 (T2MO) subunits (encoded by *tomA012345* genes) possess a high similarity in amino acid sequence and gene  
328 organization to the T2MO subunits from *B. vietnamiensis* G4 and *P. spadix* BD-a59 (Figure 1 and Table S2),  
329 suggesting a regiospecific hydroxylation of toluene into *o*-cresol and, subsequently, an oxidation into 3-  
330 methylcatechol (Shields et al., 1989; Hur et al., 1997; O'Sullivan et al., 2007). In addition, T2MO catalyzes the  
331 oxidation of dichloroethylenes, chloroform, 1,4-dioxane, aliphatic ethers, and diethyl sulphide (Hur et al., 1997;  
332 Ryoo et al., 2000; Mahendra and Alvarez-Cohen, 2006), and enables the formation of epoxides from a variety  
333 of alkene substrates (McClay et al., 2000). On the other hand, the toluene-4-monooxygenase protein (T4MO)  
334 encoded by the *tmoABCDEF* gene cluster is similar to the enzymes from *P. spadix* BD-a59,  
335 *P. mendocina* KR1 and *P. pnomensusa* 3kgm (Figure 1 and Table S2). The T4MO from strain KR1 oxidizes  
336 toluene into 4-methylcatechol and catalyzes the formation of epoxides from a variety of alkene substrates  
337 (McClay et al., 2000), as well as catalyzes the oxidation of phenols and methylphenols into catechol (Shields

338 et al., 1989). Additionally, the T4MO from *P. stutzeri* OX1 has the capability to oxidise *o*-xylene, *m*-xylene, *p*-  
339 xylene, toluene, benzene, ethylbenzene, styrene, naphthalene and tetrachloroethylene (Hur et al., 1997).  
340 Overall, T2MO and T4MO monooxygenases are capable of catalyzing three successive hydroxylations on  
341 benzene to form phenol, catechol and 1,2,3-trihydroxybenzene, respectively (Tao et al., 2004).

342 Located downstream of the *tomA012345* gene cluster, the gene cluster *tomBCEFGHI* encodes enzymes for  
343 the *meta*-cleavage and the subsequent reactions from the central pathway of benzene degradation. These  
344 enzymes are similar in amino acid sequence to the gene products of corresponding gene clusters present in  
345 *B. vietnamiensis* G4 and *Pseudomonas* sp. CF600 (Figure 1 and Table S2). The findings obtained from the  
346 genomic studies also suggest that bacteria carrying the *dmp*-encoded central pathway from *Pseudomonas* sp.  
347 CF600 share the BMM DmpKLMNOP. However, the strain CH34 possesses a gene organization that includes  
348 a different BMM upstream (T2MO) and downstream (T4MO) of this central catabolic pathway (Figure 1).  
349 Downstream of the genes encoding the benzene central catabolic pathway from CH34, a cluster of genes that  
350 encode a toluene-4-monooxygenase (*tmoABCDEF*) is located. The products of these genes are similar to the  
351 corresponding subunits from strains *C. pinatubonensis* JMP134 (TBC), *P. mendocina* KR1 and *P. spadix* BD-  
352 a59 (TMO) (Figure 1). All these bacteria have different BMMs, such as toluene monooxygenases permitting  
353 not only degrading benzene and phenol but also other BTEX compounds (Tao et al., 2004), as is the case in  
354 strain CH34. Based on results obtained from genomic analysis of genes that are involved in transport and  
355 degradation of benzene and aromatic compounds in strain CH34, we propose novel metabolic pathways for  
356 the aerobic degradation of aromatic compounds in *C. metallidurans* CH34 (Figure 4). Strain CH34 seems to  
357 have different routes for catalyzing successive hydroxylations to convert benzene into phenol and catechol as  
358 proposed in Figure 4. In strain CH34, these gene clusters are likely regulated by the *tomR* gene product  
359 (formerly Rmet\_1305), which is a XylR/NtrC-type transcriptional regulator (Table S2).

360  
361 The CH34 gene cluster *phyZABCDE* encodes the third BMM, a phenol-2-hydroxylase (P2MO). This cluster is  
362 also present in *C. pinatubonensis* JMP134 and *W. numazuensis* TE26 (Janssen et al., 2010). Downstream of  
363 the *phyZABCDE* gene cluster from CH34 is located a *catA2* gene that encodes a catechol-1,2-  
364 dioxygenase (C12O) (Figure 1 and Table S3). A second gene encoding for a C12O is located on the chromid  
365 (Rmet\_4881) and belongs to the benzoate degradation pathway (Perez-Pantoja et al., 2012). A previous study  
366 has reported that the C12O enzyme from strain CH34 is unique in its capacity to cleave diverse catechols in  
367 *ortho* position, e.g. tetrachlorocatechol, 4-fluorocatechol, 4-methylcatechol, and 3-methylcatechol (Sauret-  
368 Ignazi et al., 1996). In addition, high concentrations of 3-methylcatechol caused inhibition by substrate.  
369 Furthermore, this C12O is inhibited in the presence of phenol, diverse chlorophenols and fluorophenols  
370 (Sauret-Ignazi et al., 1996). The *phy-catA1* cluster may be controlled by PoxR, a XylR/NtrC-like transcriptional  
371 regulator that acts as an activator in presence of phenol (Table S3), which also might be associated with  
372 proteins from the central metabolism, such as DmpF, MhpF and AtoA, as predicted by bioinformatics. It has  
373 been postulated that the presence of multiple BMMs in the same organism may lead to the formation of  
374 complex modularity generating new hybrids with new substrates specificity providing optimized metabolic  
375 pathways (Notomista et al., 2003; Cafaro et al., 2004).

376

377 Based on the experimental evidence presented in this report, we suggest that benzene is transformed into  
378 phenol via various routes catalyzed by three BMMs. Previous reports have demonstrated that the subsequent  
379 conversion of phenol into catechol is the limiting step in benzene aerobic degradation (Zhu et al., 2008). This  
380 would explain the phenol accumulation as an intermediate during the growth of CH34 on benzene (Figure 2B).  
381 The catechol formation was inferred by *meta*-cleavage of the catechol ring and subsequent formation of the  
382 colored compound 2-HMS. This suggests that one or more BMMs could be activated simultaneously during  
383 the process, thereby indicating the use of mixed degradation pathways, to generate a catabolic strategy that  
384 also seems to be deployed by *C. pinatubonensis* JMP134, *R. pickettii* PKO1, and *P. spadix* BD-a59  
385 (Notomista et al., 2003; Tao et al., 2004; Perez-Pantoja et al., 2012; Choi et al., 2013). The *meta*-cleavage of  
386 the dihydroxylated ring indicates activity of a catechol-2,3-dioxygenase (C23O; TomB) that opens the catechol  
387 ring in *meta* position.

388

389 Results obtained by RT-qPCR showed a simultaneous expression of the three BMM-encoding gene clusters,  
390 and an increased expression of the gene encoding a C23O (*tomB*), HMSD (*tomC*), and HMSH (*tomD*) (Figure  
391 3). The results obtained in gene expression analyses, at early and late exponential phases, are in accordance  
392 with our predictions based on gene sequence and organization (Figure 1, Table S2). A partial repression of  
393 the gene encoding the C12O, located downstream of the phenol-2-hydroxylase subunit genes (*phyZABCDE*),  
394 is in agreement with the results obtained via bioinformatic predictions for sigma 38 (*rpoS*) dependent gene  
395 expression. This sigma factor is predominately present in late exponential and stationary phases of growth  
396 (Tanaka et al., 1993; Jishage and Ishihama, 1995), which have also been observed in this study (Figure 3). As  
397 phenol inhibits C12O (Parales et al., 2008) it is expected that *catA* gene expression would be postponed until  
398 a later phase of growth, when phenol concentration, produced during the early growth phase, eventually  
399 decreases (Figure 2). Probably C23O activity from TomB might be temporarily preferred for phenol  
400 transformations in the early stages of growth. Furthermore, the capability to use either simultaneously or  
401 sequentially a C12O and a C23O may explain why some bacteria display a high versatility in their aromatic  
402 compounds degradation capability (Parales et al., 2008). For these reasons, in this report is postulated that  
403 strain CH34 possesses a mixed peripheral benzene degradation pathway deploying three functional BMMs.  
404 First, benzene is transformed into phenol catalyzed by one or both BMMs (T2MO and T4MO), followed by  
405 phenol-level mediated activation of the genes *phyZABCDE* encoding the subunits of a third BMM transforming  
406 the toxic phenol into catechol. This postulation is the core of the present work and is supported by the results  
407 presented here.

408

409 On the other hand, the results provide evidence that suggest a *meta*-cleavage of the catechol ring during the  
410 central pathway, catalyzed by a C23O (TomB). Conversely, an *ortho*-cleavage of the dihydroxylated ring,  
411 catalyzed by a C12O, will occurs at late stages of growth (Figure 3). These results are concordant with  
412 previous reports describing *C. metallidurans* CH34 as a versatile organism that rely on a complex  
413 transcriptional regulatory network for it to survive on highly diverse contaminated environments, *i.e.* soils or  
414 water with low nutrients levels and polluted with mixtures of metal ions (Monsieur et al., 2011).

415

416 One of the most important factors that affect microbial degradation of benzene in most microorganisms, it is  
417 the high toxicity even at low concentrations (Lovley, 1995; Sandrin and Maier, 2003). A good example is the  
418 model bacterial strain for benzene degradation, *P. putida* F1, which is only capable of growing at  
419 concentrations of up to 0.55 mM (Reardon et al., 2000). In this study, CH34 cells were able to grow in 5 mM  
420 benzene until turbidity of 0.6 at 600 nm (Figure 2A). Few bacterial strains are capable of growing on high  
421 concentrations of benzene. *Rhodococcus* sp. 33, tolerates up to benzene 1 mM as carbon and energy source  
422 (Paje et al., 1997). Such unusual capabilities of strain CH34 to use diverse aromatic compounds for growth  
423 (Table 1) and tolerate high benzene concentrations, suggests that a mixed degradation pathway might be  
424 beneficial for an organism's robustness and versatility when it is faced to toxic levels of aromatic compounds.  
425 Additionally, strain CH34 possesses all the genes needed to catalyze oxidation of toluene and *o*-*m*-*p*-xylene  
426 isomers (Janssen et al., 2010; Mergeay and van Houdt, 2014), likely using the same benzene degradation  
427 pathway as proposed in Figure 4. This broad-range capacity also occurs in strains *C. pinatubonensis* JMP134,  
428 *R. pickettii* PKO1, and *P. spadix* BD-a59 (Shields et al., 1989; Parales et al., 2008; Perez-Pantoja et al., 2012;  
429 Choi et al., 2013). Nonetheless, further experimental studies are needed with strain CH34 to further  
430 characterize this metabolic pathway.

431

432 This study also revealed that *C. metallidurans* CH34 possesses the capability to grow on various aromatic  
433 compounds such as benzene, toluene, *o*-xylene, *p*-cymene, 3-hydroxybenzoate, 4-hydroxybenzoate, 3-  
434 hydroxyphenylacetate, 4-hydroxyphenylacetate, homogentisate, catechol, naphthalene, and 2-aminophenol as  
435 only carbon and energy source (Table 1). Previous studies have also reported the growth of *C. metallidurans*  
436 CH34 on the aromatic compounds benzoate, 4-hydroxybenzoate, phenol and tryptophan. In addition, strain  
437 CH34 has the capability to degrade phenylacetate and homogentisate (Mergeay and van Houdt, 2014). Our  
438 findings confirm that strain CH34 is capable of growing on either 3- or 4-hydroxybenzoate as a sole carbon  
439 and energy source (Table 1) and the genes that encode the complete benzoate degradation pathway, have  
440 been identified and found on the chromid of CH34 (Janssen et al., 2010; Perez-Pantoja et al., 2012; Mergeay  
441 and van Houdt, 2014). By bioinformatic studies, it is proposed that the enzymes responsible of the benzoate  
442 catabolic pathway are a benzoate-1,2-dioxygenase (*benABC* formerly Rmet\_4882-Rmet\_4884), a  
443 dihydroxybenzoate dehydrogenase (*benD* formerly Rmet\_4885), and a catechol-1,2-dioxygenase, C12O  
444 (*catA2* formerly Rmet\_4881), which *ortho*-cleaves the catechol ring and a subsequent conversion into  
445 intermediates of the tricarboxylic cycle (TCA) is catalyzed by three enzymes encoded by the *catBCD* locus  
446 (Table S4).

447

448 Degradation of aromatic compounds is inhibited in presence of heavy metals such as Pb(II) or Hg(II) (Said and  
449 Lewis, 1991; Benka-Coker and Ekundayo, 1998). In this study was demonstrated that *C. metallidurans* CH34  
450 is able to degrade aromatic compounds, even in presence of toxic heavy metals such as Pb(II) or Hg(II) (Table  
451 2). This strain is capable of growing on benzene (5 mM) as only carbon and energy source, in presence of  
452 Pb(II) (0.4 mM). In contrast to other strains, *C. metallidurans* CH34 is resistant to Hg(II) concentrations up to  
453 0.008 mM (Table 2). Therefore, strain CH34 stands out among other benzene degradative strains to resist

454 highest concentrations of benzene (5 mM) in presence of toxic heavy metals. The derivative strain of CH34, *C.*  
455 *metallidurans* MSR33, which carries a natural plasmid IncP-1 $\beta$  (pTP6) providing additional set of *mer* genes  
456 and conferring an increased resistance to inorganic and organic mercury compounds (Smalla et al., 2006;  
457 Rojas et al., 2011), has the capability to reduce inorganic and organic forms of Hg(II) to metallic mercury,  
458 conferring to the strain MSR33 possible significantly improvements in terms of aromatic compounds  
459 degradation in presence of heavy metals (data not shown). Therefore, other *C. metallidurans* strains may be  
460 attractive catalysts for novel bioremediation applications in complex polluted environments *i.e.* where  
461 organisms have to cope with both heavy metals and aromatic compounds, such as mining sites.

462

463 This study has shown the aromatic compounds catabolic potential and versatility of the heavy metal resistant  
464 bacteria *C. metallidurans* CH34. Additionally, this report revealed the functionality of the benzene catabolic  
465 pathway that is active even in presence of mercury or lead. Strain CH34 is able to use diverse aromatic  
466 compounds as sole carbon and energy source, indicating active catabolic pathways for the degradation of  
467 benzene, toluene, *o*-xylene, *p*-cymene, 3-hydroxybenzoate, 4-hydroxybenzoate, 3-hydroxyphenylacetate, 4-  
468 hydroxyphenylacetate, homogentisate, catechol, naphthalene, and 2-aminophenol.

469

## 470 **Author Information**

471 \*Corresponding author

472 E-mail: luis.rojas02@ucn.cl (LAR)

473 E-mail: michael.seeger@usm.cl (MS)

474 & MS and LAR are Joint Senior Authors

475

## 476 **Authors Contributions**

477 Conceived and designed the experiments: FAM FC LAR MS.

478 Performed the experiments: FAM FC

479 Data analysis: FAM VM MS LAR

480 Contributed reagents/materials/analysis tools: MS LAR

481 Wrote the paper: FAM VM MS LAR

482

## 483 **Funding Sources**

484 The authors acknowledge the following funding sources: Fondecyt 11130117 (LAR), CONICYT/BC-PhD  
485 72170403 (FM), CONICYT-PhD 21120887 (VM), Fondecyt 1151174 & 1110992 (MS) and USM 131342 &  
486 121562 (MS) grants.

487

## 488 **Acknowledgments**

489 The authors acknowledge Francisco Montero, Sebastian Fuentes and Paul Janssen for their helpful  
490 discussion and support with experimental analysis.



- 491 1. Altimira, F., Yáñez, C., Bravo, G., González, M., Rojas, L.A., Seeger, M., 2012. Characterization of  
492 copper-resistant bacteria and bacterial communities from copper-polluted agricultural soils of central  
493 Chile. BMC Microbiol. 12, 193. <http://dx.doi.org/10.1186/1471-2180-12-193>.  
494
- 495 2. Basu, S., Chowdhury, P.P., Deb, S., Dutta, T. K., 2016. Degradation Pathways of 2- and 4-  
496 Nitrobenzoates in *Cupriavidus* sp. Strain ST-14 and Construction of a Recombinant Strain, ST-  
497 14::3NBA, Capable of Degrading 3-Nitrobenzoate. App. Environ. Microbiol. 82, 4253-4263.  
498 <http://dx.doi.org/10.1128/AEM.00739-16>.  
499
- 500 3. Benka-Coker, M.O., Ekundayo, J.A., 1998. Effects of heavy metals on growth of species of  
501 *Micrococcus* and *Pseudomonas* in a crude oil/mineral salts medium. Bioresour. Technol. 66, 241–245.  
502 [http://dx.doi.org/10.1016/S0960-8524\(98\)00057-1](http://dx.doi.org/10.1016/S0960-8524(98)00057-1).  
503
- 504 4. Bertoni, G., Martino, M., Galli, E., Barbieri, P., 1998. Analysis of the gene cluster encoding toluene/o-  
505 xylene monooxygenase from *Pseudomonas stutzeri* OX1. Appl. Environ. Microbiol. 64, 3626–3632.  
506
- 507 5. Browning E., 1961. Toxicology of Organic Compounds of Industrial Importance. Annu. Rev.  
508 Pharmacol.1, 397-430.  
509
- 510 6. Cafaro, V., Izzo, V., Scognamiglio, R., Notomista, E., Capasso, P., Casbarra, A., Pucci, P., Di Donato,  
511 A., 2004. Phenol hydroxylase and toluene/o-xylene monooxygenase from *Pseudomonas stutzeri* OX1.  
512 Interplay between Two Enzymes. App. Environ. Microbiol. 70, 2211–2219.  
513
- 514 7. Chen, M., Xu, P., Zeng, G., Yang, C., Huang, D., Zhang, J., 2015. Bioremediation of soils contaminated  
515 with polycyclic aromatic hydrocarbons, petroleum, pesticides, chlorophenols and heavy metals by  
516 composting: Applications, microbes and future research needs. Biotechnol. Adv. 33, 745–755.  
517 <http://dx.doi.org/10.1016/j.biotechadv.2015.05.003>.  
518
- 519 8. Choi, E. J., Jin, H. M., Lee, S. H., Math, R. K., Madsen, E.L., Jeon, C. O., 2013. Comparative genomic  
520 analysis and benzene, toluene, ethylbenzene, and o-, m-, and p-xylene (BTEX) degradation pathways  
521 of *Pseudoxanthomonas spadix* BD-a59. Appl Environ Microbiol. 79, 663–671.  
522
- 523 9. de Avila e Silva, S., Echeverrigaray, S., Gerhardt, G. J., 2011. BacPP: Bacterial promoter prediction? A  
524 tool for accurate sigma-factor specific assignment in enterobacteria. J. Theor Biol. 287, 92–99.  
525 <http://dx.doi.org/10.1016/j.jtbi.2011.07.017>.  
526
- 527 10. Dean, B.J., 1978. Genetic toxicology of benzene, toluene, xylenes and phenols. Muta. Res. 47, 75-97.  
528



- 529 11. Dórea, H. S., Bispo, J. R. L., Aragão, K.A.S., Cunha, B.B., Navickiene, S., Alves, J.P.H., Romão,  
530 L.P.C., García, A.B., 2007. Analysis of BTEX, PAHs and metals in the oilfield produced water in the  
531 State of Sergipe, Brazil. *Microchem. J.* 85, 234–238. <http://dx.doi.org/10.1016/j.microc.2006.06.002>.  
532
- 533 12. EU Parliament, 2008. Directives: water policy. *Off J Eur Union.* 84–97.  
534
- 535 13. Franceschini, A., Szklarczyk, D., Frankild, S., Kuhn, M., Simonovic, M., Roth, A., Lin J., Minguéz P.,  
536 Bork P., von Mering C., Jensen L.J., 2013. STRING v9.1: Protein-protein interaction networks, with  
537 increased coverage and integration. *Nucleic Acids Res.* 41, 808–815.  
538 <http://dx.doi.org/10.1093/nar/gks1094>.  
539
- 540 14. Fuentes, S., Méndez, V., Aguila, P., Seeger, M., 2014. Bioremediation of petroleum hydrocarbons:  
541 Catabolic genes, microbial communities, and applications. *Appl. Microbiol. Biotechnol.* 98, 4781–4794.  
542 <http://dx.doi.org/10.1007/s00253-014-5684-9>.  
543
- 544 15. Fuchs, G., Boll, M., Heider, J., 2011. Microbial degradation of aromatic compounds - from one strategy  
545 to four. *Nat. Rev. Microbiol.* 9, 803–816. <http://dx.doi.org/10.1038/nrmicro2652>.  
546
- 547 16. Harwood, C.S., Nichols, N.N., Kim, M.K., Ditty, J.L., Parales, R.E., 1994. Identification of the *pcaRKF*  
548 gene cluster from *Pseudomonas putida*: involvement in chemotaxis, biodegradation, and transport of  
549 4-hydroxybenzoate. *J. Bacteriol.* 176, 6479-6488.  
550
- 551 17. Hearn, E.M., Patel, D.R., Lepore, B.W., Indic, M., van den Berg, B., 2009. Transmembrane passage  
552 of hydrophobic compounds through a protein channel wall. *Nature.* 458, 367–370.  
553 <http://dx.doi.org/10.1038/nature07678>.  
554
- 555 18. Hur, H., Newman, L.M., Wackett, L.P., Sadowsky, M.J., 1997. Toluene 2-Monooxygenase-Dependent  
556 Growth of *Burkholderia cepacia* G4/PR1 on Diethyl Ether. *Appl. Environ. Microbiol.* 63, 1606–1609.  
557
- 558 19. Janssen, P. J., van Houdt, R., Moors, H., Monsieurs, P., Morin, N., Michaux, A., Benotmane M.A.,  
559 Leys N., Vallaeyts T., Lapidus A., Monchy S., Médigue C., Taghavi S., McCorkle S., Dunn J., van der  
560 Lelie D., Mergeay M., 2010. The complete genome sequence of *Cupriavidus metallidurans* strain  
561 CH34, a master survivalist in harsh and anthropogenic environments. *PLoS One.* 5, e10433.  
562 <http://dx.doi.org/10.1371/journal.pone.0010433>.  
563
- 564 20. Jishage, M., Ishihama, A., 1995. Regulation of RNA polymerase sigma subunit synthesis in  
565 *Escherichia coli*: intracellular levels of sigma 70 and sigma 38. *J. Bacteriol.* 177, 6832–6835.  
566

- 567 21. Kavamura, V.N., Esposito, E., 2010. Biotechnological strategies applied to the decontamination of  
568 soils polluted with heavy metals. *Biotechnol. Adv.* 28, 61–69.  
569 <http://dx.doi.org/10.1016/j.biotechadv.2009.09.002>.  
570
- 571 22. Kovalick W., 1991. Perspectives on health and environmental risks of soil pollution and experiences  
572 with innovative remediation technologies. 4th World Congress of Chemical Engineering, Karlsruhe,  
573 Germany.  
574
- 575 23. Kovarik, W., 2005. Ethyl-lead gasoline: how a classic occupational disease became an international  
576 public health disaster. *Int. J. Occup. Env. Heal.* 11, 384-397.  
577 <http://dx.doi.org/10.1179/oeh.2005.11.4.384>.  
578
- 579 24. Kristensen, A.K., Thomsen, J.F., Mikkelsen, S., 2014. A review of mercury exposure among artisanal  
580 small-scale gold miners in developing countries. *Int. Arch. Occup. Environ. Health.* 87, 579–590.  
581 <http://dx.doi.org/10.1007/s00420-013-0902-9>.  
582
- 583 25. Lovley, D.R., 1995. Bioremediation of organic and metal contaminants with dissimilatory metal  
584 reduction. *J. Ind. Microbiol.* 14, 85-93.  
585
- 586 26. Mahendra, S., Alvarez-Cohen, L., 2006. Kinetics of 1,4-dioxane biodegradation by monooxygenase-  
587 expressing bacteria. *Environ. Sci. Technol.* 40, 5435–5442.  
588
- 589 27. McClay, K., Fox, B.G., Steffan, R.J., 2000. Toluene monooxygenase-catalyzed epoxidation of  
590 alkenes. *Appl. Environ. Microbiol.* 66,1877–1882.  
591
- 592 28. Méndez, V., Agulló, L., González, M., Seeger, M., 2011. Homogentisate and homogentisate central  
593 pathways are involved in 3-and 4-hydroxyphenylacetate degradation by *Burkholderia xenovorans*  
594 LB400. *PLoS One.* 6, e17583. <http://dx.doi.org/10.1371/journal.pone.0017583>.  
595
- 596 29. Mergeay, M., Nies, D., Schlegel, H., 1985. *Alcaligenes eutrophus* CH34 is a facultative  
597 chemolithotroph with plasmid-bound resistance to heavy metals. *J. Bacteriol.* 162, 328–334.  
598
- 599 30. Mergeay, M., Monchy, S., Vallaey, T., Auquier, V., Benotmane, A., Bertin, P., Taghavi, S., Dunn, J.,  
600 van der Lelie, D., Wattiez, R., 2003. *Ralstonia metallidurans*, a bacterium specifically adapted to toxic  
601 metals: towards a catalogue of metal-responsive genes. *FEMS Microbiol. Rev.* 27, 385–410.  
602  
603
- 604 31. Mergeay M., Van Houdt R., 2014. Adaptation to Xenobiotics and Toxic Compounds  
605 by *Cupriavidus* and *Ralstonia* with Special Reference to *Cupriavidus metallidurans* CH34 and

- 606 Mobile Genetic Elements. In: Nojiri H., Tsuda M., Fukuda M., Kamagata Y. (eds) Biodegradative  
607 Bacteria. Springer, Tokyo, pp. 105-127. [http://dx.doi.org/10.1007/978-4-431-54520-0\\_6](http://dx.doi.org/10.1007/978-4-431-54520-0_6).
- 608
- 609
- 610 32. Monchy, S., Benotmane, M.A., Janssen, P.J., Vallaey, T., Taghavi, S., van der Lelie, D., Mergeay,  
611 M., 2007. Plasmids pMOL28 and pMOL30 of *Cupriavidus metallidurans* Are Specialized in the  
612 Maximal Viable Response to Heavy Metals. *J. Bacteriol.* 189, 7417–7425.  
613 <http://dx.doi.org/10.1128/JB.00375-07>.
- 614
- 615 33. Monsieurs, P., Moors, H., Van Houdt, R., Janssen, P.J., Janssen, A., Coninx, I., Mergeay, M., Leys,  
616 N., 2011. Heavy metal resistance in *Cupriavidus metallidurans* CH34 is governed by an intricate  
617 transcriptional network. *Biometals.* 24,1133–1151. <http://dx.doi.org/10.1007/s10534-011-9473-y>.
- 618
- 619 34. Muniz, P., Danulat, E., Yannicelli, B., García-Alonso, J., 2004. Medina, G., Bicego, M. C. Assessment  
620 of contamination by heavy metals and petroleum hydrocarbons in sediments of Montevideo Harbour  
621 (Uruguay). *Environ. Int.* 29, 1019–1028. [http://dx.doi.org/10.1016/S0160-4120\(03\)00096-5](http://dx.doi.org/10.1016/S0160-4120(03)00096-5).
- 622
- 623 35. Nascimento, A.M., Chartone-Souze, E., 2003. Operon mer: bacterial resistance to mercury and  
624 potential for bioremediation of contaminated environments. *Genet. Mol. Res.* 2, 92-101.
- 625
- 626 36. Nishikawa, Y., Yasumi, Y., Noguchi, S., Sakamoto, H., Nikawa, J., 2008. Functional analyses of  
627 *Pseudomonas putida* benzoate transporters expressed in the yeast *Saccharomyces cerevisiae*.  
628 *Biosci. Biotechnol. Biochem.* 72, 2034-2038. <http://dx.doi.org/10.1271/bbb.80156>.
- 629
- 630 37. Nogales J., 2014. A Practical Protocol for Genome-Scale Metabolic Reconstructions. In: McGenity  
631 T., Timmis K., Nogales B. (eds) *Hydrocarbon and Lipid Microbiology Protocols*. Springer  
632 *Protocols Handbooks*. Springer, Berlin, Heidelberg, pp. 197-221.  
633 [http://dx.doi.org/10.1007/8623\\_2014\\_12](http://dx.doi.org/10.1007/8623_2014_12).
- 634
- 635 38. Notomista, E., Lahm, A., Di Donato, A., Tramontano, A., 2003. Evolution of bacterial and archaeal  
636 multicomponent monooxygenases. *J. Mol. Evol.* 56, 435–445. <http://dx.doi.org/10.1007/s00239-002-2414-1>.
- 637
- 638
- 639 39. Nozaki, M., Kotani, S., Ono, K., Senoh, S., 1970. Metapyrocatechase. III. Substrate specificity and  
640 mode of ring fission. *Biochem. Biophys. Acta.* 220, 213–223.
- 641
- 642 40. O'Sullivan, L.A., Weightman, A.J., Jones, T.H., Marchbank, A.M., Tiedje, J.M., Mahenthalingam, E.,  
643 2007. Identifying the genetic basis of ecologically and biotechnologically useful functions of the

- 644 bacterium *Burkholderia vietnamiensis*. Environ. Microbiol. 9, 1017–1034.  
645 <http://dx.doi.org/10.1111/j.1462-2920.2006.01228.x>.  
646
- 647 41. Overbeek, R., Begley, T., Butler, R.M., Choudhuri, J.V., Chuang, H.Y., Cohoon, M., Fonstein, M.,  
648 Frank E.D., Gerdes S., Glass E.M., Goesmann A., Hanson A., Iwata-Reuyl D., Jensen R., Jamshidi  
649 N., Krause L., Kubal M., Larsen N., Linke B., McHardy A.C., Meyer F., Neuweger H., Olsen G., Olson  
650 R., Osterman A., Portnoy V., Pusch G.D., Rodionov D.A., Rückert C., Steiner J., Stevens R., Thiele I.,  
651 Vassieva O., Ye Y., Zagnitko O., Vonstein V., 2005. The subsystems approach to genome annotation  
652 and its use in the project to annotate 1000 genomes. Nucleic Acids Research. 33, 5691-5702.  
653 <http://dx.doi.org/10.1093/nar/gki866>.
- 654
- 655 42. Paje, M., Neilan, B., Couperwhite I., 1997. A *Rhodococcus* species that thrives on medium saturated  
656 with liquid benzene. Microbiology. 143, 2975–2981. <http://dx.doi.org/10.1099/00221287-143-9-2975>.  
657
- 658 43. Parales, R.E., Parales, J.V., Pelletier, D.A., Ditty, J.L., 2008. Diversity of microbial toluene degradation  
659 pathways. Adv. Appl. Microbiol. 64, 1–73. [http://dx.doi.org/10.1016/S0065-2164\(08\)00401-2](http://dx.doi.org/10.1016/S0065-2164(08)00401-2).  
660
- 661 44. Pfaffl, M.W., 2001. A new mathematical model for relative quantification in real-time RT-PCR. Nucleic  
662 Acids Res. 29, 45e – 45.  
663
- 664 45. Pfaffl, M.W., Tichopad, A., Prgomet, C., Neuvians, T.P., 2004. Determination of stable housekeeping  
665 genes, differentially regulated target genes and sample integrity: BestKeeper - Excel-based tool using  
666 pair-wise correlations. Biotechnol. Lett. 26, 509–515.  
667
- 668 46. Pérez-Pantoja, D., Donoso, R., Agulló, L., Córdova, M., Seeger, M., Pieper, D.H., González, B., 2012.  
669 Genomic analysis of the potential for aromatic compounds biodegradation in *Burkholderiales*. Environ.  
670 Microbiol. 14, 1091-1117. <http://dx.doi.org/10.1111/j.1462-2920.2011.02613.x>.  
671
- 672 47. Reardon, K.F., Mosteller, D.C., Bull Rogers, J.D., 2000. Biodegradation kinetics of benzene, toluene,  
673 and phenol as single and mixed substrates for *Pseudomonas putida* F1. Biotechnol. Bioeng. 69, 385–  
674 400.
- 675
- 676 48. Rojas, L.A., Yáñez, C., González, M., Lobos, S., Smalla, K., Seeger, M., 2011. Characterization of the  
677 metabolically modified heavy metal-resistant *Cupriavidus metallidurans* strain MSR33 generated for  
678 mercury bioremediation. PLoS One. 6, e17555. <http://dx.doi.org/10.1371/journal.pone.0017555>.  
679

- 680 49. Rosier, C., Leys, N., Henoumont, C., Mergeay, M., Wattiez, R., 2012. Purification and characterization  
681 of the acetone carboxylase of *Cupriavidus metallidurans* Strain CH34. *Appl. Environ. Microbiol.* 78,  
682 4516–4528. <http://dx.doi.org/10.1128/AEM.07974-11>.  
683
- 684 50. Rui, L., Reardon, K.F., Wood, T.K., 2005. Protein engineering of toluene *ortho*-monooxygenase of  
685 *Burkholderia cepacia* G4 for regiospecific hydroxylation of indole to form various indigoid compounds.  
686 *Appl. Microbiol. Biotechnol.* 66, 422–429. <http://dx.doi.org/10.1007/s00253-004-1698-z>.  
687
- 688 51. Ryoo, D., Shim, H., Canada, K., Barbieri, P., Wood, T. K., 2000. Aerobic degradation of  
689 tetrachloroethylene by toluene-o-xylene monooxygenase of *Pseudomonas stutzeri* OX1. *Nat.*  
690 *Biotechnol.* 18, 775–778. <http://dx.doi.org/10.1038/77344>.  
691
- 692 52. Said, W.A., Lewis, D.L., 1991. Quantitative assessment of the effects of metals on microbial  
693 degradation of organic chemicals. *Appl. Environ. Microbiol.* 57, 1498–1503.  
694
- 695 53. Sandrin, T.R., Maier, R.M., 2003. Impact of metals on the biodegradation of organic pollutants.  
696 *Environ. Health Perspect.* 111, 1093–1101.  
697
- 698 54. Sauret-Ignazi, G., Gagnon, J., Béguin, C., Barrelle, M., Markowicz, Y., Pelmont, J., Toussaint A.,  
699 1996. Characterisation of a chromosomally encoded catechol 1,2-dioxygenase (E.C. 1.13.11.1) from  
700 *Alcaligenes eutrophus* CH34. *Arch. Microbiol.* 166, 42–50.  
701
- 702 55. Seyferth, D., 2003. The rise and fall of tetraethyllead. 2. *Organometallics.* 22, 5154–5178.  
703 <http://dx.doi.org/10.1021/om030621b>.  
704
- 705 56. Shields, M.S., Montgomery, S.O., Chapman, P.J., Cuskey, S.M., Pritchard, P.H., 1989. Novel pathway  
706 of toluene catabolism in the trichloroethylene-degrading bacterium G4. *Appl. Environ. Microbiol.* 55,  
707 1624-1629.  
708
- 709 57. Silver, S., 1996. Bacterial resistances to toxic metal ions - A review. *Gene.* 179, 9-19.  
710
- 711 58. Smalla, K., Haines, A.S., Jones, K., Krögerrecklenfort, E., Heuer, H., Schlöter, M., Thomas, C.M.,  
712 2006. Increased abundance of IncP-1beta plasmids and mercury resistance genes in mercury-  
713 polluted river sediments: first discovery of IncP-1beta plasmids with a complex mer transposon as the  
714 sole accessory element. *Appl. Environ. Microbiol.* 72, 7253–7259.  
715 <http://dx.doi.org/10.1128/AEM.00922-06>.  
716
- 717 59. Tanaka, K., Takayanagi, Y., Fujita, N., Ishihama, A., Takahashi, H., 1993. Heterogeneity of the  
718 principal sigma factor in *Escherichia coli*: the *rpoS* gene product, sigma 38, is a second principal

- 719 sigma factor of RNA polymerase in stationary-phase *Escherichia coli*. Proc. Natl. Acad. Sci USA. 90,  
720 3511-3515.  
721
- 722 60. Tao, Y., Fishman, A., Bentley, W.E., Wood, T.K., 2004. Oxidation of benzene to phenol, catechol, and  
723 1,2,3-trihydroxybenzene by toluene 4-monooxygenase of *Pseudomonas mendocina* KR1 and toluene  
724 3-monooxygenase of *Ralstonia pickettii* PKO1. Appl. Environ. Microbiol. 70, 3814-3820.  
725 <http://dx.doi.org/10.1128/AEM.70.7.3814-3820.2004>.  
726
- 727 61. Taylor, S., Wakem, M., Dijkman, G., Alsarraj, M., Nguyen, M., 2010. A practical approach to RT-  
728 qPCR-Publishing data that conform to the MIQE guidelines. Methods. 50, S1–5.  
729 <http://dx.doi.org/10.1016/j.ymeth.2010.01.005>.  
730
- 731 62. Thiele, I., Palsson, B.Ø., 2010. A protocol for generating a high-quality genome-scale metabolic  
732 reconstruction. Nat. Protoc. 5, 93–121. <http://dx.doi.org/10.1038/nprot.2009.203>.  
733
- 734 63. USEPA, 2006. USEPA region III risk-based concentration Table: technical background information.  
735
- 736 64. Van der Perk, M., 2014. Soil and water contamination. 2<sup>nd</sup> Edition. Organic Pollutants. CRC Press,  
737 Leiden, p. 167.  
738
- 739 65. Veiga M.M., Meech J.A., 1999. Reduction of Mercury Emissions from Gold Mining Activities and  
740 Remedial Procedures for Polluted Sites. In: Azcue J.M. (eds) Environmental Impacts of Mining  
741 Activities. Environmental Science. Springer, Berlin, Heidelberg, pp. 143-162.  
742 [http://dx.doi.org/10.1007/978-3-642-59891-3\\_10](http://dx.doi.org/10.1007/978-3-642-59891-3_10).  
743
- 744 66. World health organization, 1993. International programme on chemical safety. Environmental health  
745 criteria 150. Benzene.  
746
- 747 67. Zamanian, M., Mason, J., 1987. Benzene dioxygenase in *Pseudomonas putida*. Subunit  
748 composition and immuno-cross-reactivity with other aromatic dioxygenases. Biochem. J. 244, 611–  
749 616.
- 750 68. Zhu, C., Zhang, L., Zhao, L., 2008. Molecular cloning, genetic organization of gene cluster encoding  
751 phenol hydroxylase and catechol 2,3-dioxygenase in *Alcaligenes faecalis* IS-46. World J. Microbiol.  
752 Biotechnol. 24,1687–1695. <http://dx.doi.org/10.1007/s11274-008-9660-3>.  
753  
754  
755  
756  
757



758 **Table 1:** Growth of *C. metallidurans* CH34 on aromatic compounds as sole carbon and energy sources  
 759

| Carbon source                     | <i>C. metallidurans</i> CH34 | <i>B. xenovorans</i> LB400 | <i>P. putida</i> mt-2 | <i>P. putida</i> G7 |
|-----------------------------------|------------------------------|----------------------------|-----------------------|---------------------|
| benzene <sup>a</sup>              | ++                           | NT                         | +                     | -                   |
| toluene <sup>a</sup>              | +++                          | NT                         | +++                   | -                   |
| <i>o</i> -xylene <sup>a</sup>     | +                            | NT                         | -                     | -                   |
| <i>p</i> -cymene <sup>a</sup>     | +++                          | NT                         | +                     | +                   |
| 3-hydroxybenzoate                 | ++                           | +                          | +++                   | +++                 |
| 4-hydroxybenzoate                 | +++                          | +++                        | +++                   | +++                 |
| 3-hydroxyphenylacetate            | ++                           | ++                         | +++                   | +++                 |
| 4-hydroxyphenylacetate            | +++                          | +++                        | ++                    | ++                  |
| naphtalene                        | ++                           | +                          | -                     | +++                 |
| 2-aminophenol                     | ++                           | ++                         | NT                    | NT                  |
| homogentisate                     | +++                          | +++                        | +++                   | +++                 |
| catechol                          | +++                          | +++                        | +++                   | +++                 |
| succinate or glucose <sup>b</sup> | +++                          | +++                        | +++                   | +++                 |

760  
 761 Growth level observed (+) slight, (++) moderate, (+++) high; (-) no growth; (NT) not tested.

762 <sup>a</sup>Compounds provided in gaseous phase.

763 <sup>b</sup>For comparison purposes, bacteria were grown on succinate (strains CH34, G7 and mt-2) or glucose (strain  
 764 LB400), and mentioned as positive just if values obtained overpassed strain growth without carbon source.

765  
 766  
 767  
 768  
 769  
 770  
 771  
 772  
 773

774 **Table 2:** Minimal inhibitory concentration of Hg(II) and Pb(II) for CH34 cells grown on succinate or benzene.  
775

| Metal [mM]       | Strain CH34 | Strain CH34 | Ratio (fold) <sup>a</sup> |
|------------------|-------------|-------------|---------------------------|
|                  | Succinate   | Benzene     |                           |
| Hg <sup>+2</sup> | 0.025       | 0.008       | -3.0                      |
| Pb <sup>+2</sup> | 0.600       | 0.400       | -1.5                      |

776 <sup>a</sup>Ratio (fold) expressed as heavy metal resistance from CH34 cells grown on succinate compared to cells  
777 grown on benzene 5 mM.

778

779

780

781

782

783

784

785

786

787

788

789

790

791

792

793

794

795

796

797

798

799

800

801

802

803

804

805

806

807

808 **Legends**

809

810 **Figure 1. Organization of gene clusters involved in the catabolism of benzene in *C. metallidurans* CH34**  
811 **and other *Proteobacteria*.** The orientations of ORFs are represented by open arrows. Sizes of genes and  
812 intergenic regions are to scale.

813

814 **Figure 2. Formation of the metabolic intermediates phenol and semialdehyde-2-hydroxymuconic**  
815 **during the growth of *C. metallidurans* CH34 on benzene. A.** CH34 cells were grown in LPTMS minimal  
816 medium using benzene (5 mM) as sole carbon and energy sources. Control assay without carbon source are  
817 also depicted. **B.** The metabolic intermediates were analyzed by HPLC. Benzene degradation (squares),  
818 phenol formation (triangle) and the generation of semialdehyde-2-hydroxymuconic (2-HMS; circle) after *meta*-  
819 cleavage of the catechol ring are indicated. Control assays without bacteria showed no degradation (data not  
820 shown). Each point is an average  $\pm$  SDs of results from at least three independent assays.

821

822 **Figure 3. Transcriptional analysis of genes from the benzene catabolic pathway.** RT-qPCR assays were  
823 performed using mRNA from CH34 cells grown on LPTMS minimal medium supplemented with  
824 benzene (5 mM) until early exponential phase (turbidity at 600 nm of 0.2~0.3; dark grey column) and late  
825 exponential phase (turbidity at 600 nm of 0.5~0.6; grey column). The genes encode for toluene-benzene-2-  
826 monooxygenase (*tomA3*), toluene-4-monooxygenase (*tmoA*), phenol-2-monooxygenase (*phyC*), catechol-2,3-  
827 dioxygenase (*tomB*), catechol-1,2-dioxygenase (*catA1* and *catA2*), hydroxymuconic semialdehyde  
828 dehydrogenase (*tomC*), 2-hydroxymuconic semialdehyde hydrolase (*tomD*), sigma factor 38 (*rpoS*), LysR-type  
829 transcriptional regulators (*benM* and *catM*), XylR/NtrC-type transcriptional regulators (*tomR* and *poxR*). The  
830 *gyrB* gene was used as a reference gene. The primer pairs used are listed in Table S1. The fold-change in  
831 gene expression was calculated relative to CH34 cells grown in succinate. *p* value= 0.1%.

832

833 **Figure 4: Model of aerobic aromatic compounds degradation in *C. metallidurans* CH34.** Gene(s),  
834 substrate(s) and product(s) of each enzyme are indicated. **A.** Transporters: monoaromatic hydrocarbons  
835 FadL/TbuX-type transporter (TomX, red); benzoate ABC-type transporter (BenK, blue); protocatechuate and  
836 4-hydroxybenzoate belonging to the Major Facilitator Superfamily (PcaK, green). **B.** Peripheral and central  
837 catabolic pathways catalyzed by toluene-2-monooxygenase (*tomA012345*, red arrow), phenol-2-hydroxylase  
838 (*phyZABCDE*, orange arrow) and toluene-4-monooxygenase (*tmoABCDEF*, brown arrow), benzoate-1,2-  
839 dioxygenase (*benAB*, blue arrow), 1,2-*cis*-dihydroxybenzoate dehydrogenase (*benD*, blue arrow), 4-  
840 hydroxybenzoate monooxygenase (*pobA*, green arrow), C23O (*tomB*, pink arrow), C12O (*catA1* and *catA2*,  
841 green arrow), HMSH (*tomD*, pink arrow); enzymes from the central catabolic pathways for monoaromatic  
842 compounds (*tomCEFGHI*, yellow arrow), catechol (*catBCD*, light blue arrow), protocatechuate (*pcaBCDGH*,  
843 green arrows) and entrance to the tricarboxylic acid cycle (TCA, dark red dotted line). **C.** Organization and  
844 proposed gene regulation: LysR-type transcriptional regulators (purple arrow), CatM (blue square), BenM  
845 (blue circle) and PcaQ (green hexagon); AraC type transcriptional regulator (PobR, green triangle); XylR/NtrC-

846 type transcriptional regulators dependent of *sigma* 54 factor (early exponential phase) TomR (red hexagon)  
847 and PoxR (orange star). Benzene is detected by TomR and triggers activation of peripheral degradation  
848 pathway (*tmoABCDEF* and *tomA012345*). Phenol is detected by TomR and triggers a conformational change  
849 and activation of the central degradation pathway (*tomBCEFGHID*); PoxR recognizes presence of phenol in  
850 the system and activates *phyZABCDE* genes. The *sigma* 38 factor (purple hexagon) present at late  
851 exponential growth phase regulates the transcription of the C12O *catA2* located downstream from the *phy*  
852 genes. Presence of *cis,cis*-muconate is recognized by CatM and BenM generating a synergistic activation of  
853 the *ortho*-catechol degradation pathway. The entry of 4-hydroxybenzoate to the cell is recognized by PobR  
854 triggering a transcriptional activation of the *pobA* gene. Formation of 3-carboxy-*cis,cis*-muconate generates  
855 expression of the central protocatechuate degradation pathway. The promoter regions are denoted with small  
856 black arrows bent in the directions of transcription and were identified by BacPP. Protein-protein interactions  
857 were analyzed using STRING v9.1 software. The sizes of genes and intergenic regions are to scale.

858

859

860

861

862

863

864

865

866

867

868

869

870

871

872

873

874

875

876

877

878

879

880

881

882

**Cupriavidus metallidurans CH34 (chromosome)**

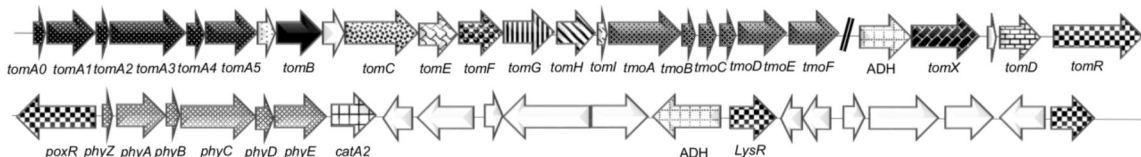

**Burkholderia vietnamiensis G4 (plasmid pBVIE04)**

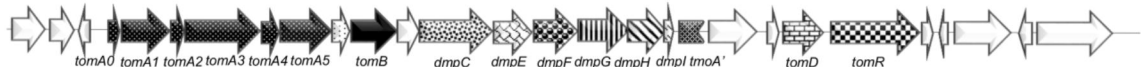

**Cupriavidus pinatubunensis JMP134 (chromosome 1 and 2)**

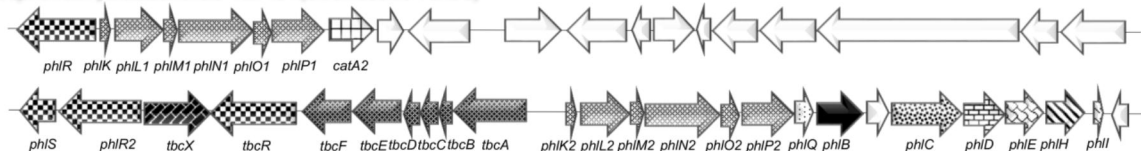

**Pseudoxanthomonas spadix BDa-59 (chromosome)**

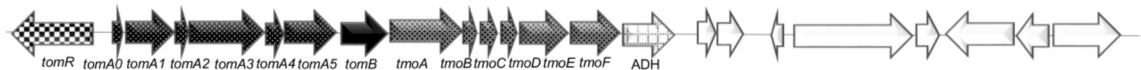

**Pseudomonas sp. CF600 (plasmid pV1150)**

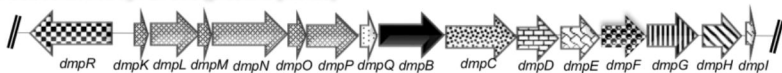

**Pseudomonas mendocina KR1 (location not reported)**

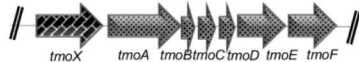

1 kb

Betaproteobacteria

Gammaproteobacteria

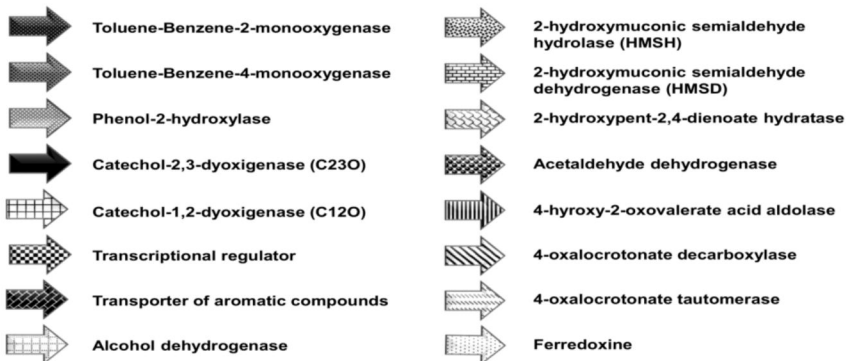

**A.**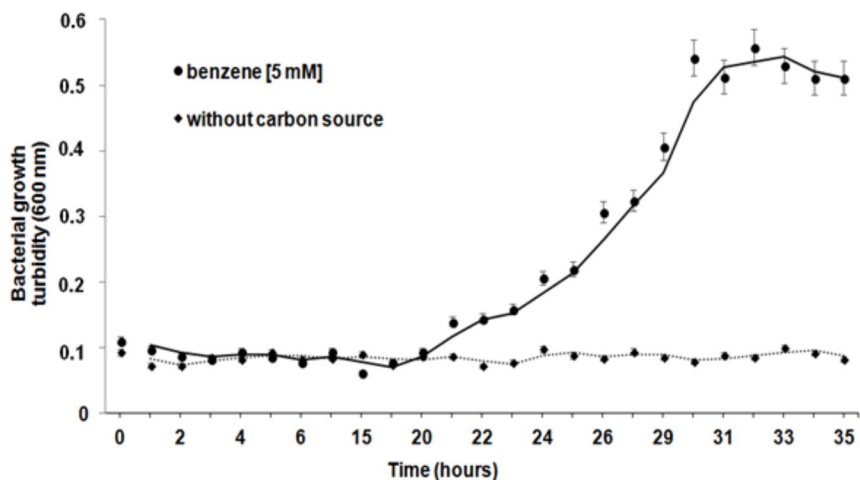**B.**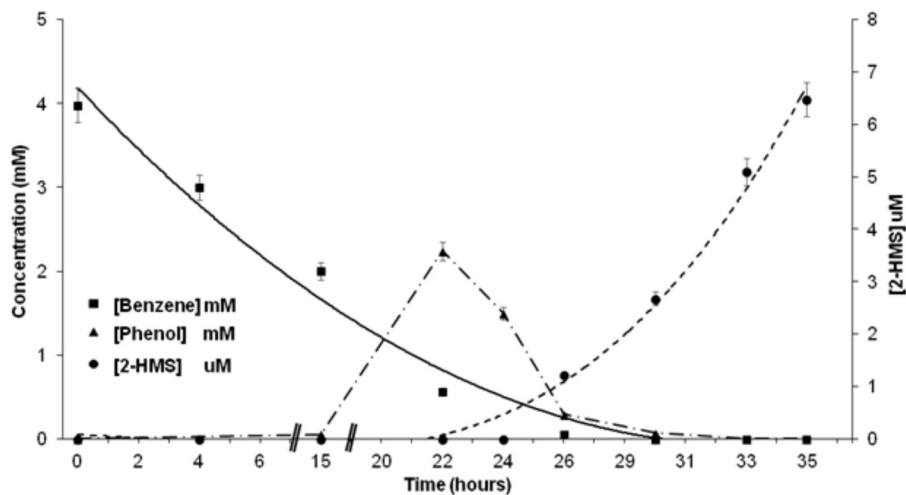



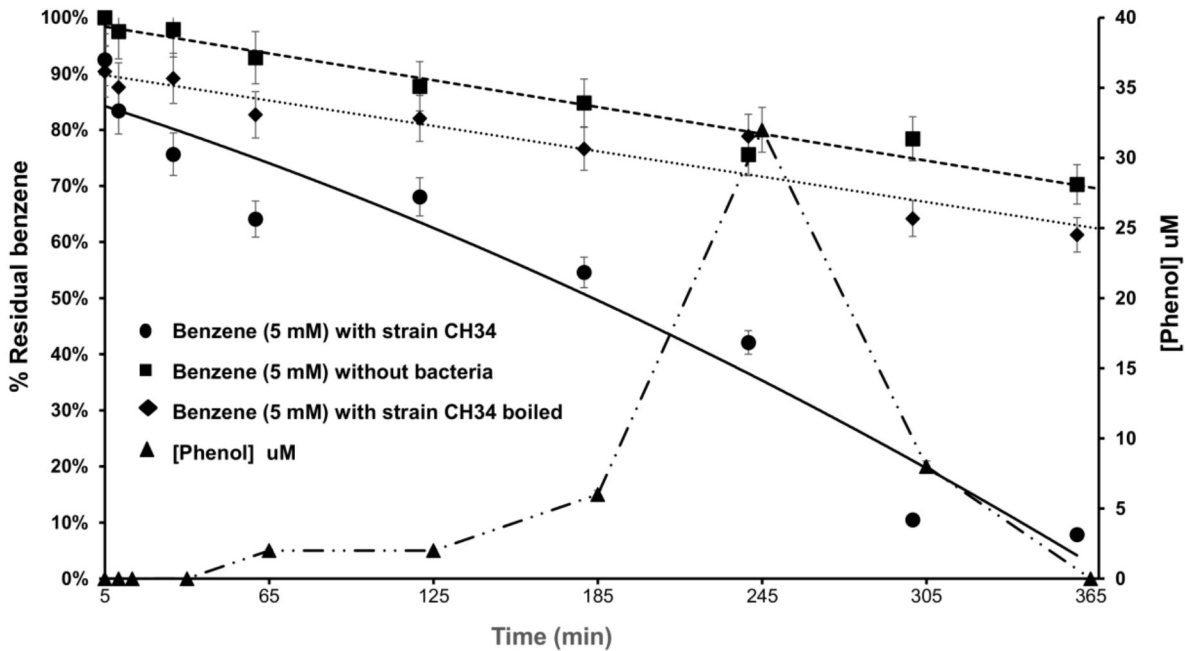

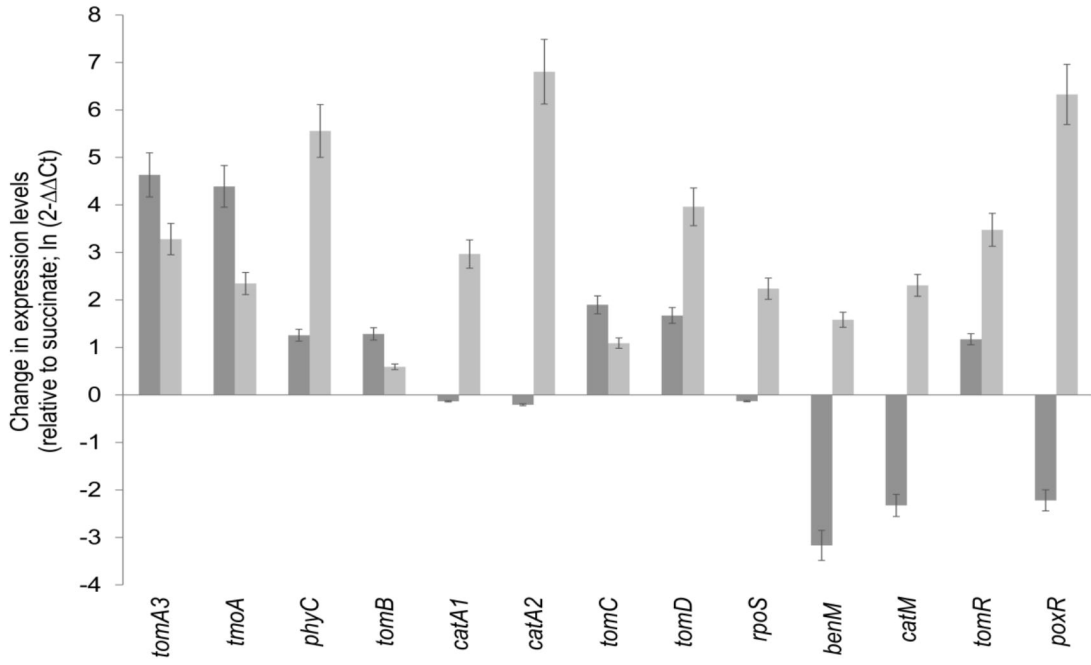

Source: http://www.biorxiv.org/content/10.1101/164517v1.full.pdf
